# Supplementary material for: Inhibition of Mcl-1 Synergistically Enhances the Antileukemic Activity of Gilteritinib and MRX-2843 in Preclinical Models of FLT3-Mutated Acute Myeloid Leukemia
Source: MDPI journal article supplement (doi:10.3390/cells11172752), 2022-09-03
Supplement: s1 [file s1]

# **Inhibition of Mcl-1 Synergistically Enhances the Antileukemic Activity of Gilteritinib and MRX-2843 in Preclinical Models of *FLT3*-mutated Acute Myeloid Leukemia**

Shuangshuang Wu <sup>1,2</sup>, Holly Edwards <sup>3,4</sup>, Deying Wang <sup>5</sup>, Shuang Liu <sup>2</sup>, Xinan Qiao <sup>2</sup>, Jenna Carter <sup>6,7</sup>, Yue Wang <sup>1</sup>, Jeffrey W. Taub <sup>8,9,10</sup>, Guan Wang <sup>2,\*</sup>, and Yubin Ge <sup>3,4,6,\*</sup>

#

<sup>1</sup> Department of Pediatric Hematology, The First Hospital of Jilin University, Changchun 130021, China

<sup>2</sup> National Engineering Laboratory for AIDS Vaccine, School of Life Sciences, Jilin University, Changchun 130012, China

<sup>3</sup> Department of Oncology, Wayne State University School of Medicine, Detroit, MI 48202, USA

<sup>4</sup> Molecular Therapeutics Program, Karmanos Cancer Institute, Wayne State University School of Medicine, Detroit, MI 48201, USA

<sup>5</sup> The Tumor Center of the First Hospital of Jilin University, Changchun 130021, China

<sup>6</sup> Cancer Biology Graduate Program, Wayne State University School of Medicine, Detroit, MI 48201, USA

<sup>7</sup> MD/PhD Program, Wayne State University School of Medicine, Detroit, MI 48201, USA

<sup>8</sup> Department of Pediatrics, Wayne State University School of Medicine, Detroit, MI 48202, USA

<sup>9</sup> Division of Pediatric Hematology and Oncology, Department of Pediatrics, Children's Hospital of Michigan, Detroit, MI 48201, USA

<sup>10</sup> Department of Pediatrics, Central Michigan University College of Medicine, Mt. Pleasant, MI 48859, USA

\*Correspondence: [gey@karmanos.org](mailto:gey@karmanos.org); Tel:313-578-4285 (Y.G.); [wg10@jlu.edu.cn](mailto:wg10@jlu.edu.cn) (G.W.)

## Materials

MitoSOX<sup>TM</sup> Red was purchased from Thermo Fisher Scientific (Rockford, IL, USA). Cycloheximide was purchased from Sigma-Aldrich (St. Louis, MO, USA).

## Methods

### *Detection of mitochondrial reactive oxygen species (ROS)*

MV4-11 and MOLM-13 cells were treated with the indicated drugs for 3 hours. The treated cells were washed with PBS twice and resuspended in PBS ( $3 \times 10^5$  cells/0.5 mL), and 0.5  $\mu$ L of 5 mM MitoSOX Red solution was added to the cells and incubated at 37°C for 10 minutes in the dark. Then the cells were washed with PBS three times, and mean fluorescence intensity was detected by flow cytometry and normalized to vehicle control.

### Legends for supplemental figures

**Figure S1. AZD5991 synergistically enhances apoptosis induced by gilteritinib and MRX-2843 in *FLT3*-wt AML cell lines.** (A) Whole cell lysates from HL-60, MOLM-13, MV4-11, OCI-AML3, and THP-1 cells were subjected to western blotting and probed with the indicated antibodies. Densitometry results (normalized to  $\beta$ -actin and compared to MOLM-13 or OCI-AML3) are shown below the corresponding blot. (B) HL-60, OCI-AML3, and THP-1 cells treated with varying concentrations of AZD5991 (AZD), gilteritinib (gilt), or MRX-2843 (MRX), alone or in combination, for 24 h were stained with annexin V-FITC/propidium iodide (PI) and analyzed using a flow cytometer. Combination Index (CI) values were calculated using CompuSyn software.  $CI < 1$ ,  $CI = 1$ , and  $CI > 1$  indicate synergistic, additive, and antagonistic effects, respectively. \*\*\* indicates  $p < 0.001$ . (C) THP-1 cells were treated with AZD, gilt, AZD + gilt, MRX, or MRX +

AZD for 24 h. Whole cell lysates were subjected to western blotting analysis and probed with the indicated antibodies.

**Figure S2. AZD5991 synergistically enhances apoptosis induced by gilteritinib and MRX-2843 in *FLT3*-wt primary AML patient samples.** Primary AML patient sample cells treated with varying concentrations of AZD5991 (AZD), gilteritinib (gilt), or MRX-2843 (MRX), alone or in combination, for 24 h were stained with annexin V-FITC/PI and analyzed using a flow cytometer. CI values were calculated using CompuSyn software.  $CI < 1$ ,  $CI = 1$ , and  $CI > 1$  indicate synergistic, additive, and antagonistic effects, respectively. \*\*\* indicates  $p < 0.001$ . ND indicates not determined.

**Figure S3. Protein stability does not likely play a role in the suppression of c-Myc by gilteritinib and MRX-2843.** (A) MOLM-13 cells were treated with vehicle control, AZD, gilt, MRX, or in combination for 3 h. The cells were washed and then treated with 10  $\mu$ g/mL cycloheximide for up to 2 h. Western blots were generated utilizing whole cell lysates. Representative blots are shown in panel A. Densitometry measurements (normalized to  $\beta$ -actin and compared to 0 min) are graphed in panel B. c-Myc half-life was calculated using GraphPad Prism (panel C).

**Figure S4. *FLT3* inhibition enhances AZD5991-induced cytochrome *c* release in MOLM-13 cells.** MOLM-13 cells were treated with vehicle control, AZD5991 (AZD), gilteritinib (gilt), MRX-2842 (MRX), or in combination for 3 h. Cellular fractionation was performed. Mitochondrial and cytosolic fractions were subjected to western blot analysis. This experiment

was performed 2 independent times in triplicate. One representative image is shown in panel A. Relative densitometry measurements were determined, normalized to  $\beta$ -actin or VDAC1, and compared to the vehicle control. Results from one representative experiment are graphed as mean  $\pm$  SEM in panel B. \* indicates  $p < 0.05$ , \*\* indicates  $p < 0.01$  and \*\*\* indicates  $p < 0.001$  compared to vehicle control. # indicates  $p < 0.05$  compared to single drug treatment. (C) MOLM-13 cells were treated vehicle control, AZD, Gilt, MRX, or in combination for 3 h. Western blots were generated utilizing whole cell lysates. Densitometry results (normalized to  $\beta$ -actin and compared to vehicle control) are shown below the corresponding blot. (D&E) MOLM-13 cells were treated with vehicle control, AZD, 10058-F4, or in combination for 3 h. Cellular fractionation was performed. Mitochondrial and cytosolic fractions were subjected to western blot analysis. This experiment was performed 2 independent times in triplicate. One representative image is shown in panel D. Relative densitometry measurements were determined, normalized to  $\beta$ -actin or VDAC1, and compared to the vehicle control. Results from one representative experiment are graphed as mean  $\pm$  SEM in panel E. \* indicates  $p < 0.05$ , \*\* indicates  $p < 0.01$  and \*\*\* indicates  $p < 0.001$  compared to vehicle control. ### indicates  $p < 0.001$  compared to single drug treatment. (F) MOLM-13 cells were treated with vehicle control, AZD, 10058-F4, or in combination for 3 h. Western blots were generated utilizing whole cell lysates. Densitometry results (normalized to  $\beta$ -actin and compared to vehicle control) are shown below the corresponding blot.

**Figure S5. Gilteritinib and MRX-2843 suppress Mcl-1 in *FLT3*-mutated AML cells.** MOLM-13, MV4-11, and primary AML cells (AML#246) were treated with vehicle control, AZD5991 (AZD), gilteritinib (Gilt), or MRX-2843 (MRX), alone or in combination, for 3 h. Whole cell lysates were subjected to western blotting and probed with the indicated antibodies. Densitometry

results (normalized to  $\beta$ -actin and compared to vehicle control) are shown below the corresponding blot.

**Figure S6. Gilteritinib and MRX-2843 enhance AZD5991-induced mitochondrial ROS in FLT3-ITD AML cells.** (A) MV4-11 and MOLM-13 cells were treated with vehicle control, AZD5991 (AZD), gilteritinib (gilt), or MRX-2843 (MRX), alone or in combination, for 3 h. Cells were stained with MitoSOX Red and analyzed by flow cytometry. \*\*\* indicates  $p < 0.001$  compared to control. ## indicates  $p < 0.01$  and ### indicates  $p < 0.001$  compared to single drug treatment. (B) MV4-11 and MOLM-13 cells were treated with vehicle control, AZD, 10058-F4, or AZD + 10058-F4 for 3 h. Cells were stained with MitoSOX Red and analyzed by flow cytometry. \*\*\* indicates  $p < 0.001$  compared to control. ## indicates  $p < 0.01$  and ### indicates  $p < 0.001$  compared to single drug treatment.

Figure S1

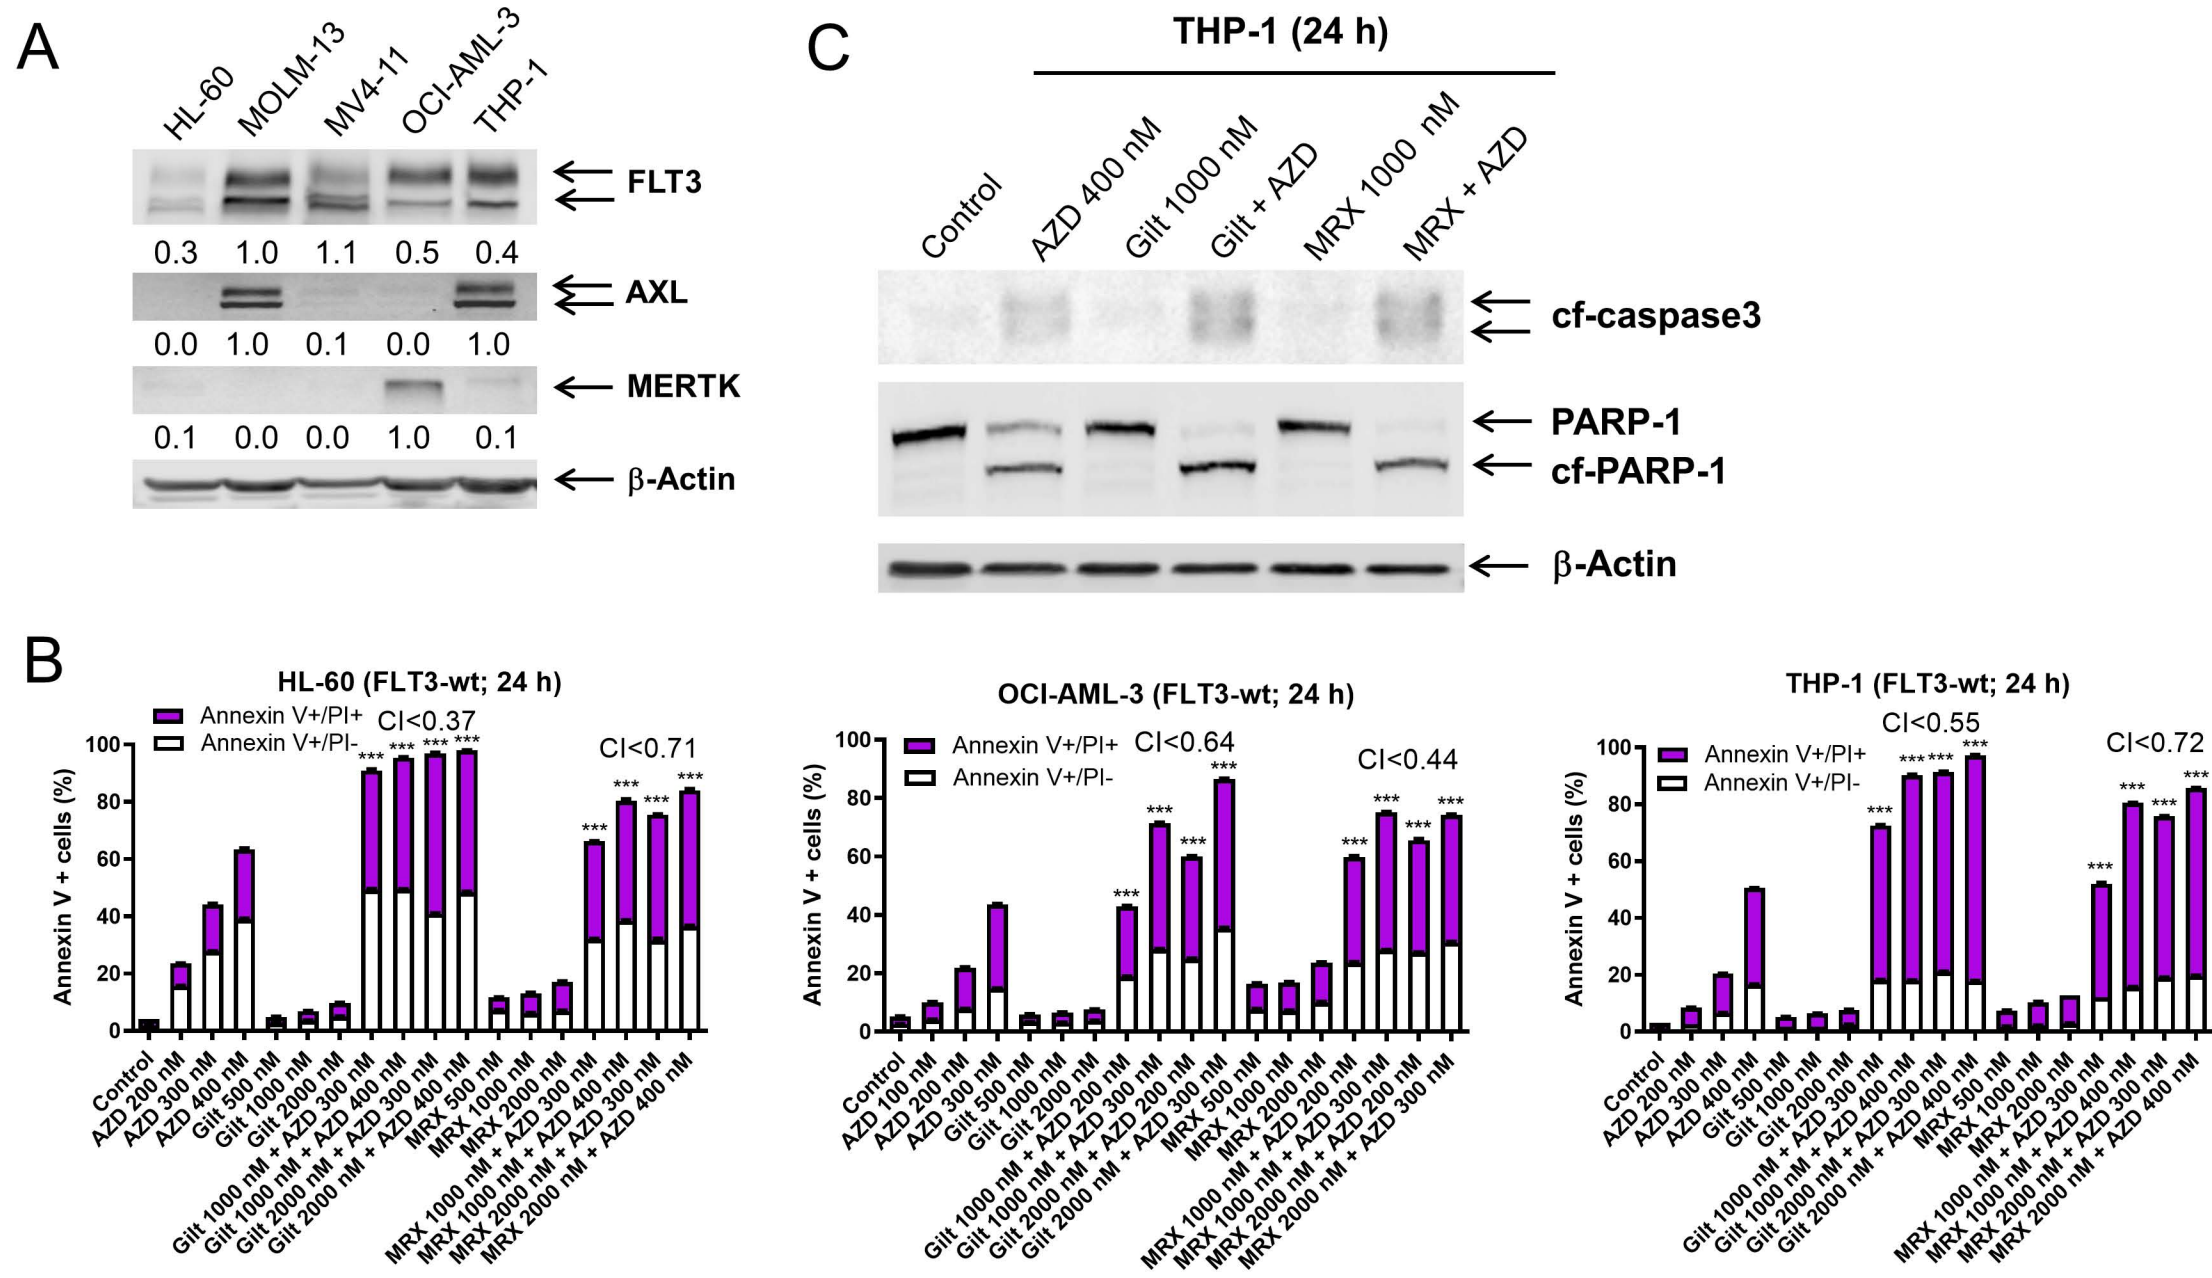

# Figure S2

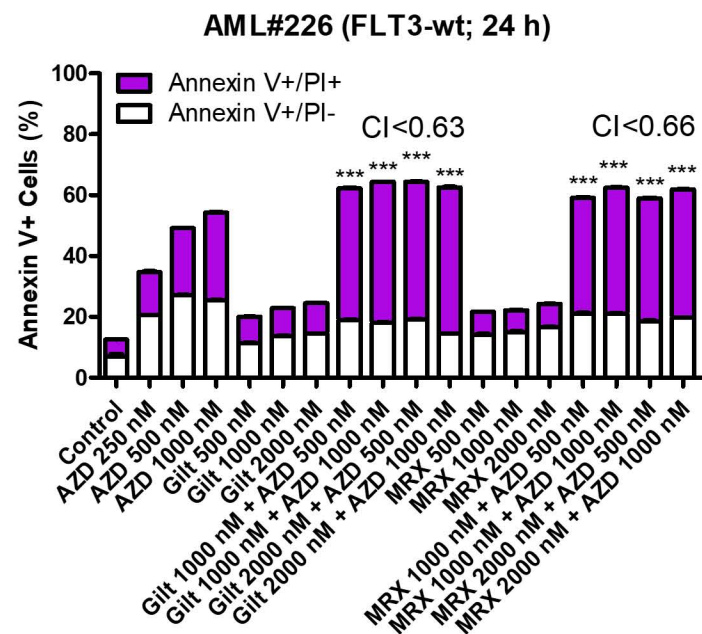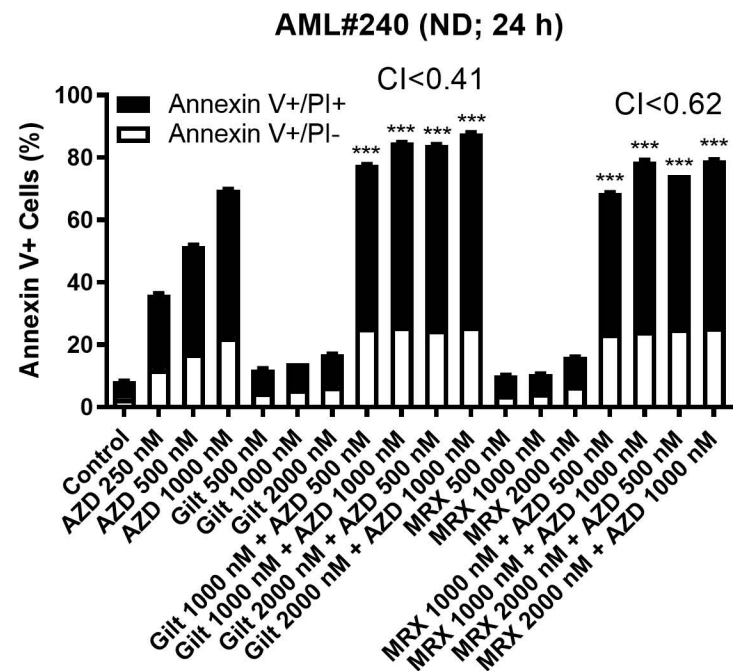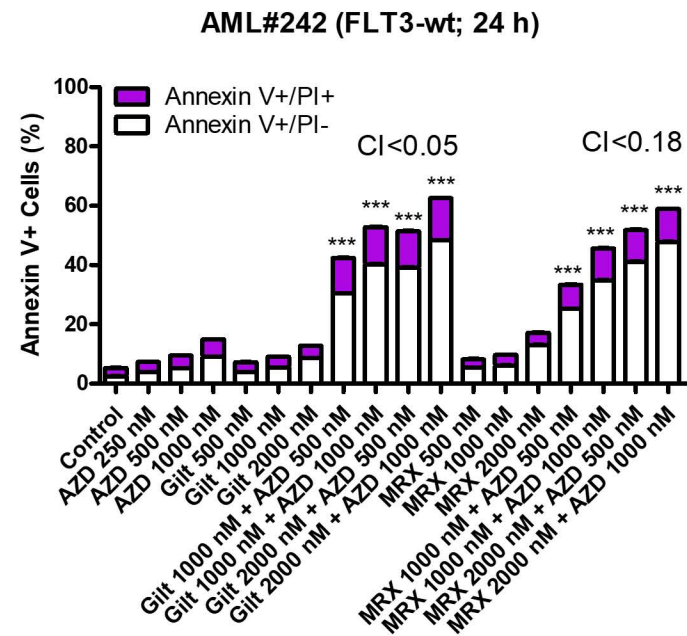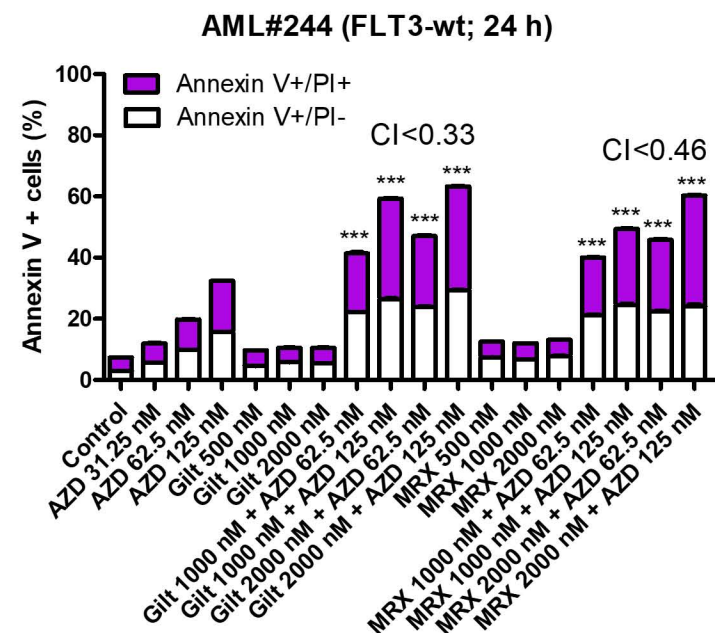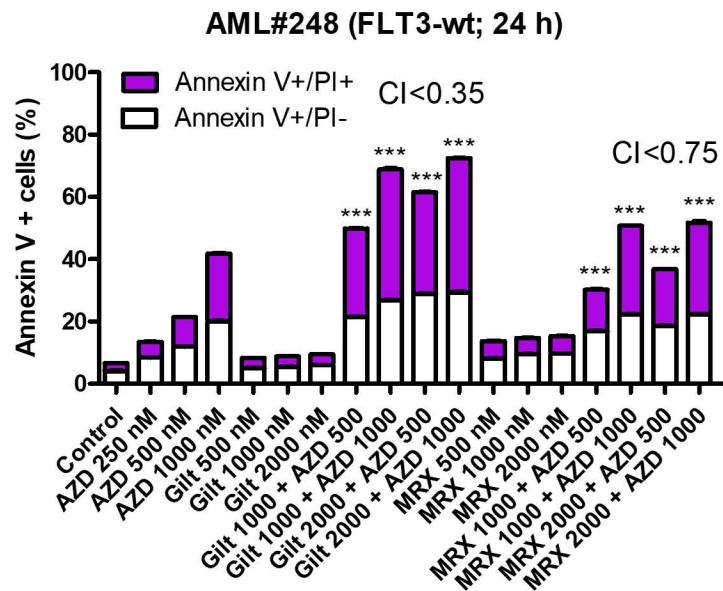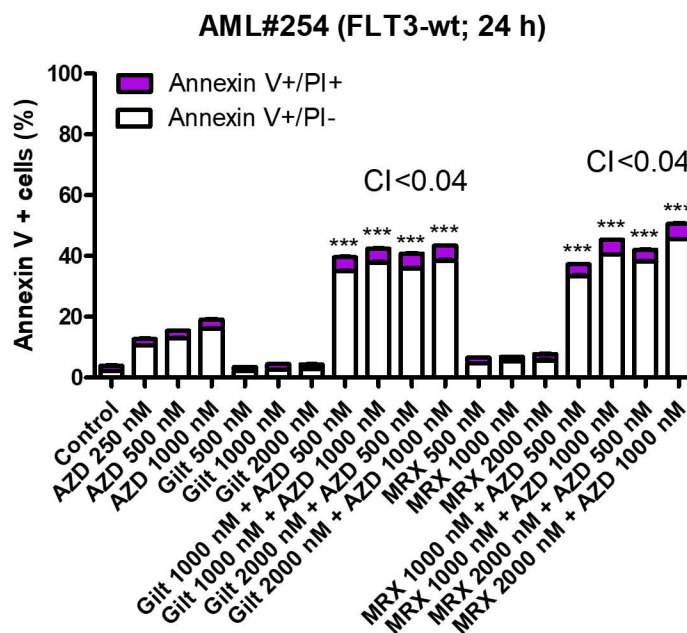



Figure S3

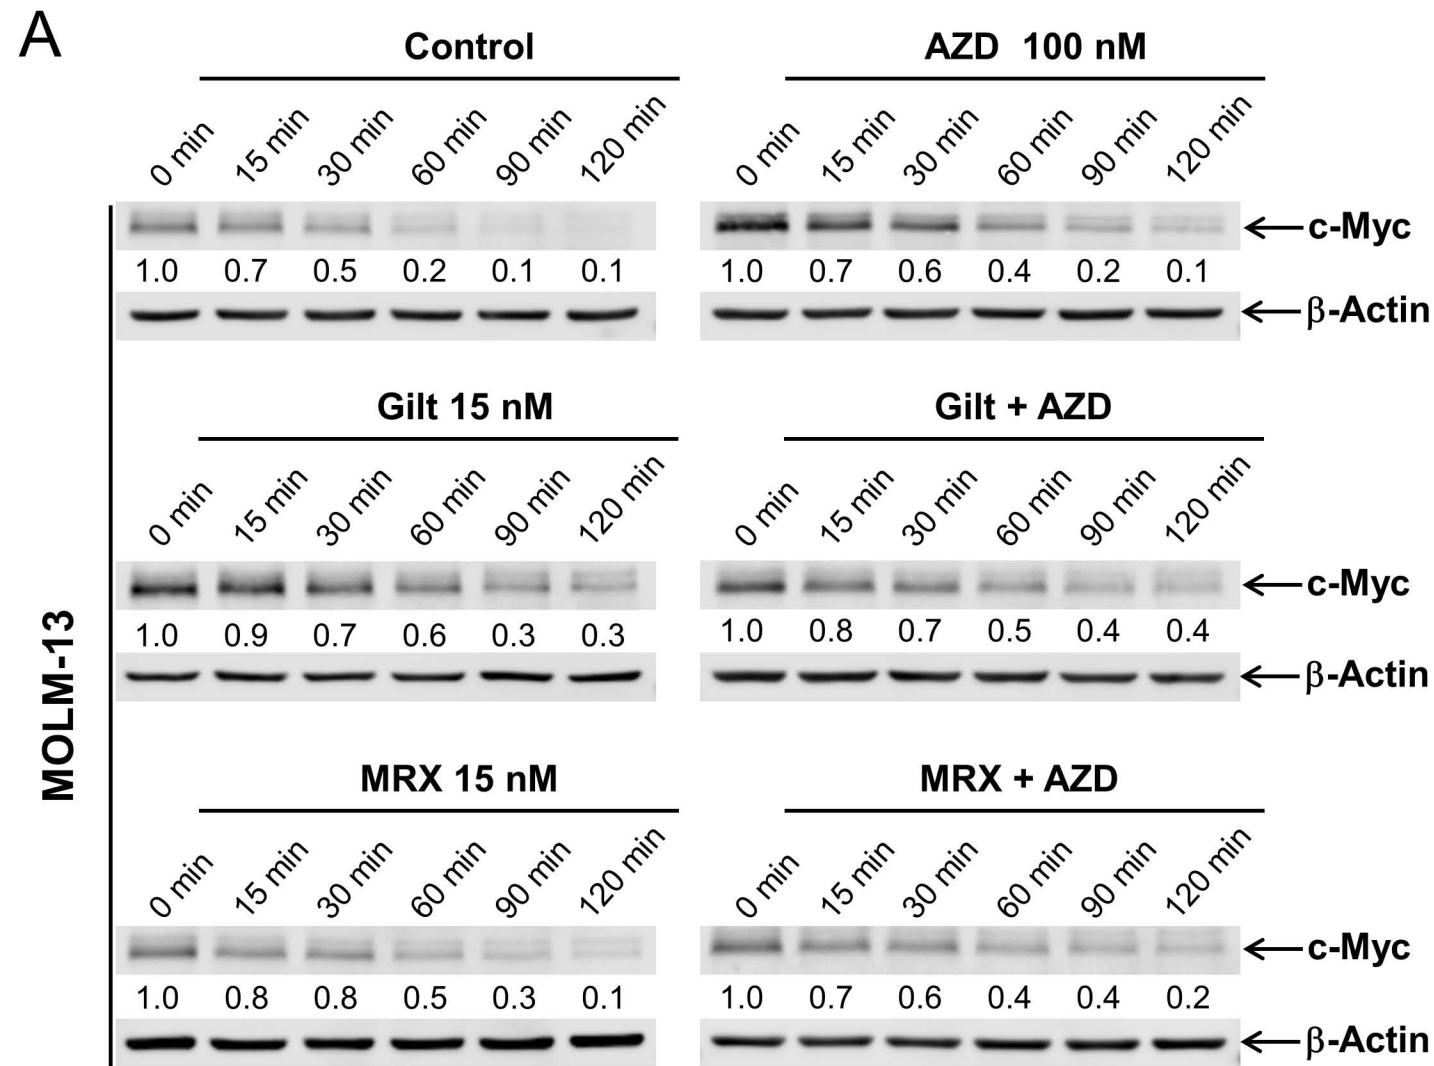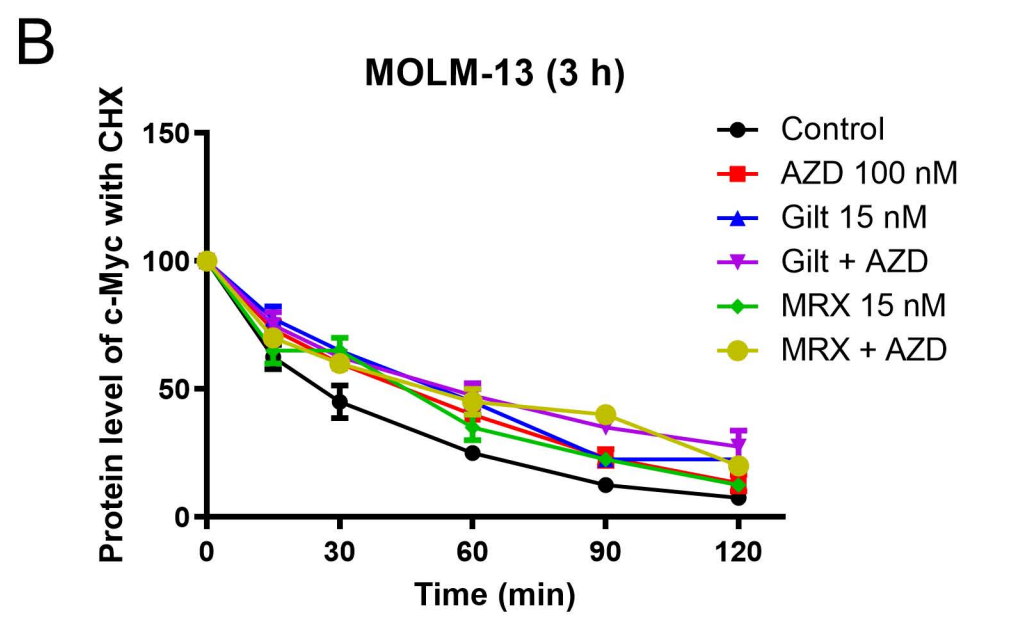

**C**

| c-Myc protein half-life in MOLM-13 cells post drug treatment |         |            |            |            |           |           |
|--------------------------------------------------------------|---------|------------|------------|------------|-----------|-----------|
| Experimental condition                                       | Control | AZD 100 nM | Gilt 15 nM | Gilt + AZD | MRX 15 nM | MRX + AZD |
| c-Myc $t_{1/2}$ (min)                                        | 24      | 38         | 45         | 51         | 35        | 44        |



Figure S4A-C

A

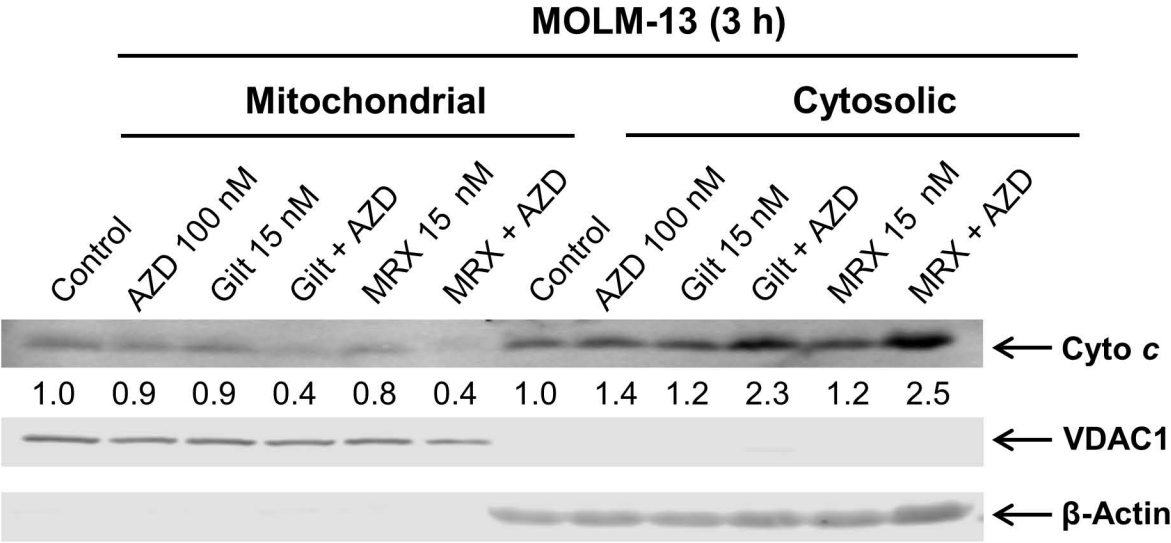

B

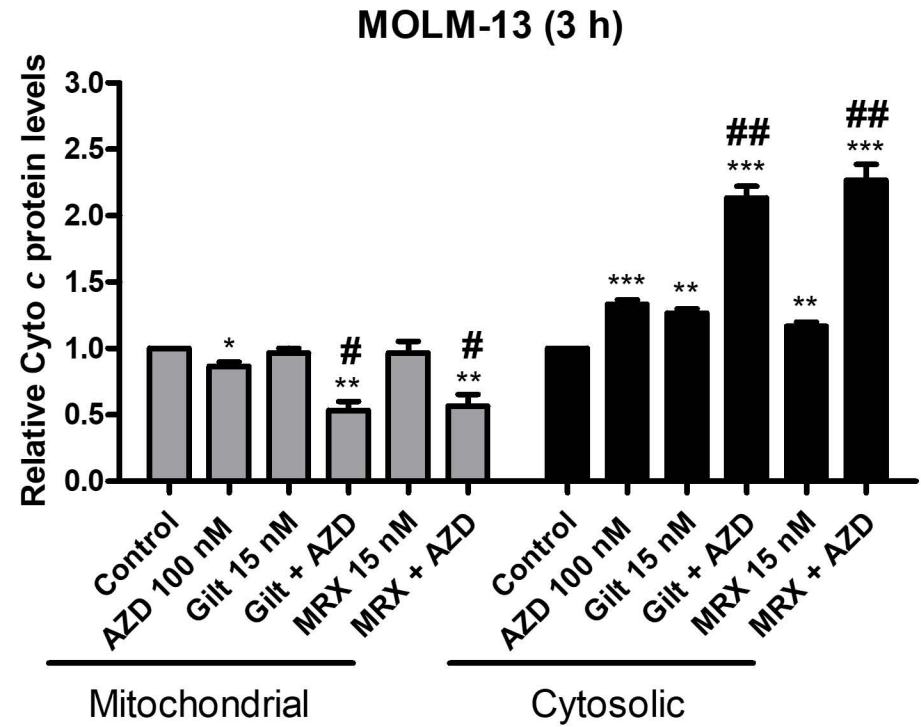

C

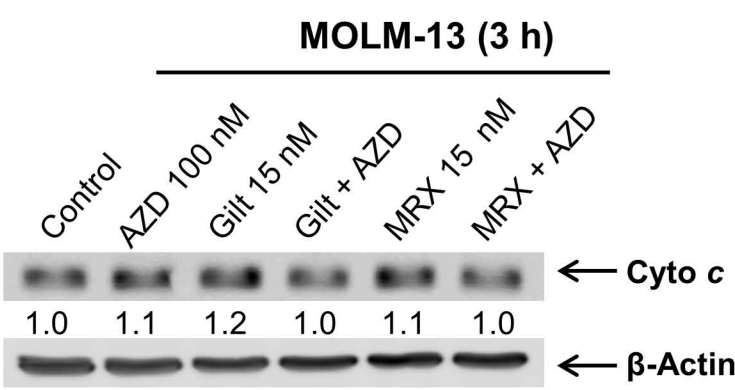

Figure S4D-I

D

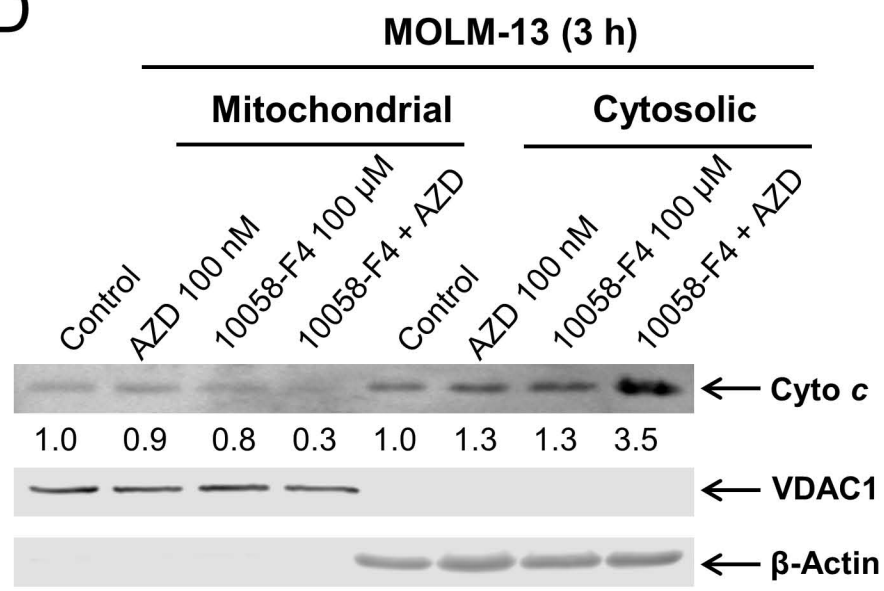

E

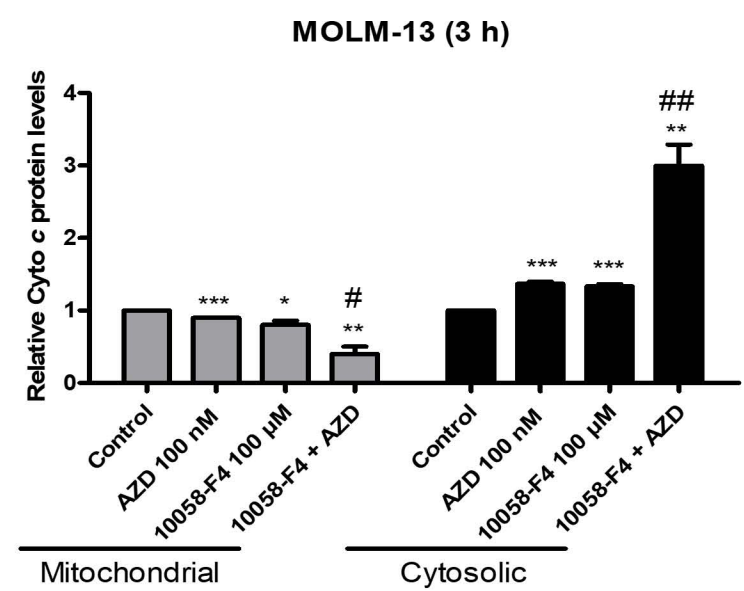

F

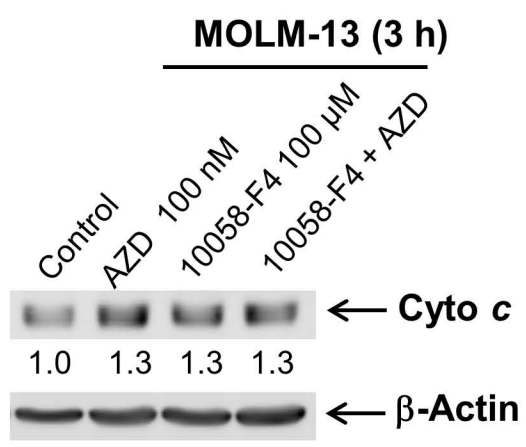

Figure S5

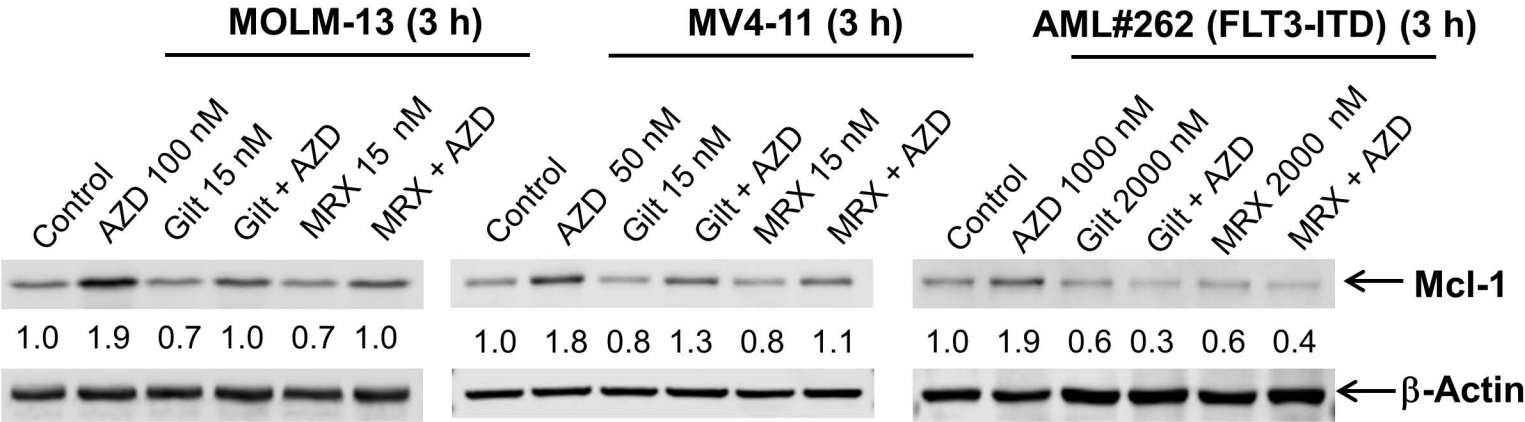

Figure S6

A

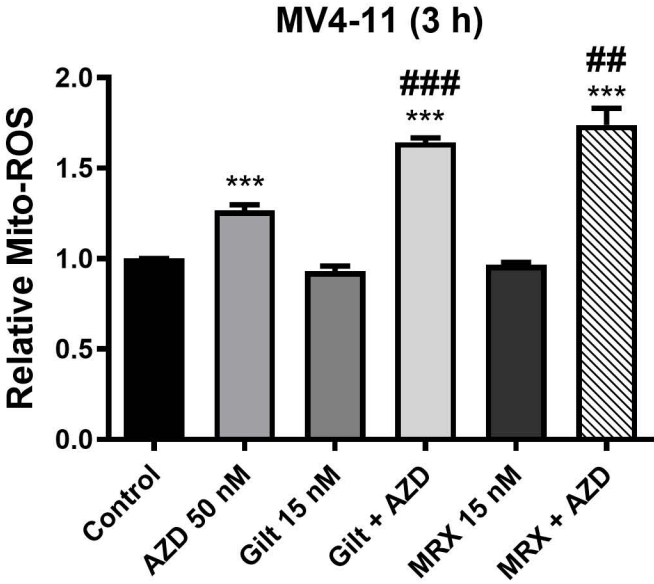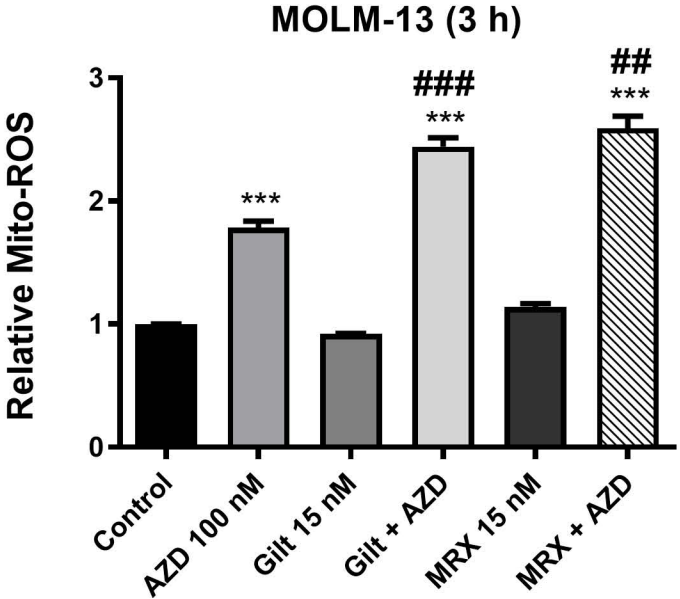

B

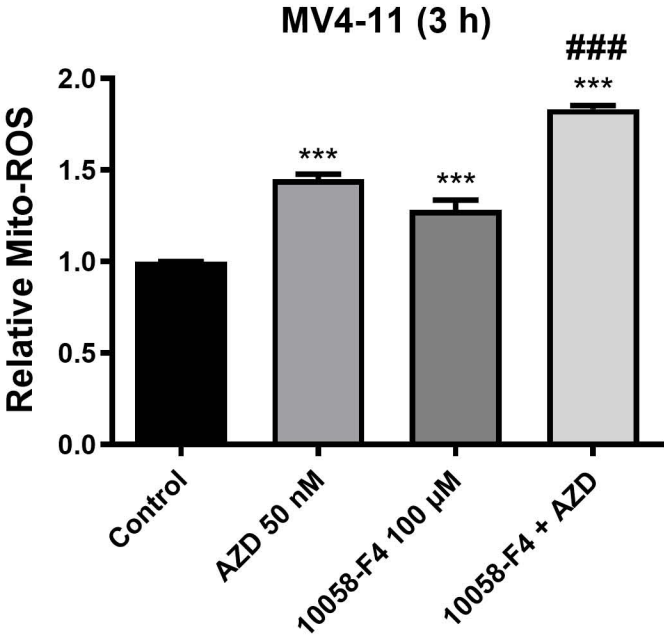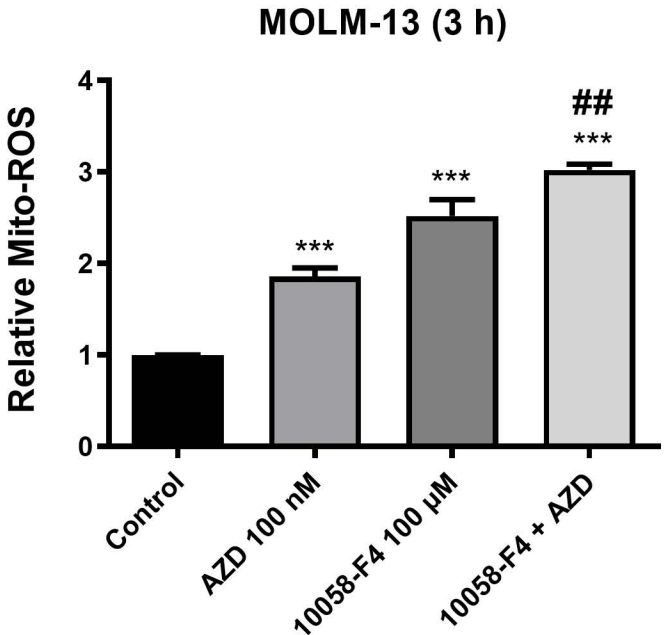

**Table S1. Patient characteristics of the primary AML patient samples used in this study**

| Patient | Gender | Age (year) | Disease status  | FAB subtype | Cytogenetics                                       | Blast purity (%) | Gene mutation/Fusion gene                    |
|---------|--------|------------|-----------------|-------------|----------------------------------------------------|------------------|----------------------------------------------|
| AML#213 | Male   | 3          | Newly diagnosed | M4/M5       | 46, XY                                             | 64               | FLT3-ITD                                     |
| AML#213 | Male   | 3          | Newly diagnosed | M4/M5       | 46, XY                                             | 64               | FLT3-ITD                                     |
| AML#217 | Male   | 66         | Newly diagnosed | M2          | 47, XY, +13/46, XY                                 | 94               | FLT3-ITD, NPM1, TET2                         |
| AML#226 | Female | 64         | Newly diagnosed | AML         | 46, XX                                             | 87               | CEBPA                                        |
| AML#240 | Male   | 8          | Newly diagnosed | AML         | 46, XY, inv(16)(p13q22)/47, XY, +8,inv(16)(p13q22) | 78.5             | NA                                           |
| AML#242 | Male   | 63         | Newly diagnosed | M3          | 46, XY, t(15;17)(q24;q21)/46, XY                   | 91               | PML/RARa, WT1, PRAME                         |
| AML#244 | Male   | 50         | Newly diagnosed | AML         | 47, XY, t(4;11)(q21;q23), +6                       | 90.5             | negative                                     |
| AML#245 | Female | 31         | Newly diagnosed | M3          | 46, XX, t(15;17)(q24;q21)/46,XX                    | 97               | FLT3-ITD, PML/RARa, WT1, PRAME               |
| AML#246 | Male   | 38         | Newly diagnosed | AML         | 46, XY                                             | 77.5             | FLT3-ITD, FLT3-TKD, MLL-PTD                  |
| AML#248 | Male   | 16         | Newly diagnosed | AML         | 45, X,-Y                                           | 79               | CEBPA, NRAS, PTPN11                          |
| AML#254 | Female | 15         | Newly diagnosed | M5          | 46, XX                                             | 78               | MLL-AF9, KMT2A, NF1                          |
| AML#256 | Male   | 57         | Newly diagnosed | M4/M5       | 47, XY, +8                                         | 80.5             | FLT3-TKD, DNMT3A, SH2B3, TCF, RUNX1, MLL-PTD |
| AML#257 | Female | 53         | Newly diagnosed | M4/M5       | 46, XX                                             | 94.5             | FLT3-ITD, NPM1, TET2                         |
| AML#262 | Male   | 57         | Newly diagnosed | AML         | 46,XY                                              | 70.5%            | FLT3-ITD, DNMT3A, IDH2, dupMLL               |
